# Supplementary material for: A structural equation modelling approach examining the pathways between safety climate, behaviour performance and workplace slipping
Source: PubMed Central journal article supplement — Occup Environ Med. 2015 Feb 20;72(7):476–81. doi: 10.1136/oemed-2014-102496 (PMC4484367; doi:10.1136/oemed-2014-102496), 2015-02-20
Supplement: oemed-2014-102496-s1.pdf [file oemed-2014-102496-s1.pdf]

## Appendix 1

Descriptive statistics for the six safety climate items for the 349 participants. Responses ranged from 1 (Strongly Do Not Agree) to 5 (Strongly Agree).

| Item                                                                          | Mean | Standard Deviation |
|-------------------------------------------------------------------------------|------|--------------------|
| There is an effective safety training program for new employees               | 4.10 | 1.26               |
| Employees receive adequate, on-going training to work safely                  | 4.07 | 1.24               |
| The management team reacts quickly to solve safety problems                   | 4.38 | 0.99               |
| The management team provides all the equipment necessary to do the job safely | 4.46 | 1.02               |
| The management team provides a lot of information on safety issues            | 4.12 | 1.14               |
| The management team emphasizes safe behavior above all other activities       | 4.21 | 1.12               |
